# Supplementary material
Source: PubMed Central journal article supplement (PMC10557026)
Supplement: jama-e2319574-s001.pdf [file jama-e2319574-s001.pdf]

## Data Sharing Statement

Sodhi. Risk of Gastrointestinal Adverse Events Associated With Glucagon-Like Peptide-1 Receptor Agonists for Weight Loss. *JAMA*. Published October 05, 2023.

doi:10.1001/jama.2023.19574

### Data

**Data available:** No

### Additional Information

**Explanation for why data not available:** No patient data was collected in this study. Any specific definition of data fields can be provided.
